# Supplementary material for: Population Distribution Analyses Reveal a Hierarchy of Molecular Players Underlying Parallel Endocytic Pathways
Source: PLoS One. 2014 Jun 27;9(6):e100554. doi: 10.1371/journal.pone.0100554 (PMC4074053; doi:10.1371/journal.pone.0100554)
Supplement: Table S7 — Cytoskeleton-related genes tested in the high-resolution classification assay. p values (Student's T-test) and normalized means of a sub-set of cytoskeletal genes selected based on their Cytoskeleton GO classification. Genes not tested in the primary screen are highlighted in red. This subset of genes was tested separately in the high-resolution classification assay (Figure S6 ), to assess their roles in the CG pathway. (XLS) [file pone.0100554.s015.xls]

## Sheet: Cytoskeleton Hits
Gene Information		Pvalue	Normalized Mean			Pvalue	Normalized Mean			Pvalue	Normalized Mean			Pvalue	Normalized Mean			Pvalue	Normalized Mean			Pvalue	Normalized Mean			Pvalue	Normalized Mean			Pvalue	Normalized Mean			Pvalue	Normalized Mean			Pvalue	Normalized Mean			Pvalue	Normalized Mean			Pvalue	Normalized Mean
CG number	Gene Name	Chase_Fint1(Pvalue)	Chase_Fint1(Mean1)	Chase_Fint1(Mean2)	Chase_Fint1(Mean3)	Chase_Fint2(Pvalue)	Chase_Fint2(Mean1)	Chase_Fint2(Mean2)	Chase_Fint2(Mean3)	Chase_Fint3(Pvalue)	Chase_Fint3(Mean1)	Chase_Fint3(Mean2)	Chase_Fint3(Mean3)	Chase_Fint4(Pvalue)	Chase_Fint4(Mean1)	Chase_Fint4(Mean2)	Chase_Fint4(Mean3)	Chase_Fnum(Pvalue)	Chase_Fnum(Mean1)	Chase_Fnum(Mean2)	Chase_Fnum(Mean3)	Chase_Fmph1(Pvalue)	Chase_Fmph1(Mean1)	Chase_Fmph1(Mean2)	Chase_Fmph1(Mean3)	Chase_Fmph2(Pvalue)	Chase_Fmph2(Mean1)	Chase_Fmph2(Mean2)	Chase_Fmph2(Mean3)	Chase_Fmph3(Pvalue)	Chase_Fmph3(Mean1)	Chase_Fmph3(Mean2)	Chase_Fmph3(Mean3)	Chase_Fclc(Pvalue)	Chase_Fclc(Mean1)	Chase_Fclc(Mean2)	Chase_Fclc(Mean3)	Pulse_Fint1(Pvalue)	Pulse_Fint1(Mean1)	Pulse_Fint1(Mean2)	Pulse_Fint1(Mean3)	Pulse_Fint2(Pvalue)	Pulse_Fint2(Mean1)	Pulse_Fint2(Mean2)	Pulse_Fint2(Mean3)	Pulse_Fint3(Pvalue)	Pulse_Fint3(Mean1)	Pulse_Fint3(Mean2)	Pulse_Fint3(Mean3)
CG10002	fork head	0.163097	1.01712	1.02941	1.08777	0.813634	0.843558	0.794612	1.24147	0.932172	0.83517	0.787696	1.32545	0.304551	0.977158	0.969174	1.00116	0.856373	0.705461	0.614509	1.95321	0.639677	1.62786	1.93071	0.290368	0.748596	1.20766	1.25155	0.739024	0.812927	1.1807	1.16747	0.774745	0.690101	0.635144	1.10227	1.69385	0.11002	1.05413	1.10159	1.21885	0.861676	0.791872	0.840411	1.2738	0.740345	0.705057	0.749575	1.3159
CG10521	Netrin-B	0.705519	0.987712	1.00486	0.981583	0.23658	1.21149	1.17629	0.995563	0.254242	1.30426	1.18867	0.987823	0.333797	0.972687	0.984222	0.992944	0.636279	0.807864	1.15273	0.655237	0.644104	0.838827	0.466391	1.27624	0.522424	0.916584	0.789213	1.08718	0.500237	0.94188	0.836313	1.05157	0.218231	1.57003	1.03225	1.22144	0.697327	1.13127	0.972198	0.973175	0.658843	1.32168	0.964639	0.926977	0.750816	1.35896	0.964693	0.864179
CG10540	capping protein alpha	0.0280425	1.16982	1.1006	1.12256	0.43888	0.969057	0.942298	0.863682	0.356387	0.900083	0.907416	0.826672	0.109836	0.980259	0.947236	0.957097	0.232515	1.94104	1.17165	1.23853	0.198941	0.286531	0.214395	0.433626	0.461183	0.764668	0.514438	0.710837	0.40418	0.791699	0.624753	0.674254	0.528813	1.02519	0.535326	0.405337	0.568815	0.946284	0.850665	0.867365	0.190163	0.845022	0.714669	0.681738	0.162088	0.787906	0.674478	0.646376
CG10574	Inhibitor-2	0.468833	0.89829	0.994908	0.986256	0.0295565	0.683993	0.759888	0.688333	0.0198587	0.63379	0.709135	0.640874	0.398846	0.989915	1.03625	1.02324	0.377143	0.638002	1.1339	0.427128	0.00365055	2.84533	2.38165	3.24931	0.00944382	1.61943	1.74176	1.69544	0.0129422	1.48628	1.56489	1.5179	0.0789955	0.781863	0.800495	0.480788	0.0784853	0.847177	0.953288	0.901891	0.00586023	0.659502	0.76582	0.612383	0.00276124	0.577116	0.642842	0.483373
CG10688	CG10688	0.837116	1.04127	1.03417	0.946506	0.192962	0.969694	0.852873	0.675883	0.0894916	0.893309	0.775528	0.623735	0.673461	0.972179	0.993454	1.00987	0.268799	1.72999	1.51555	0.897786	0.663363	0.6011	0.782728	2.75707	0.184023	1.29316	1.42252	2.16484	0.177437	1.2843	1.34659	1.94157	0.419399	0.772766	1.10089	0.73878	0.879361	1.08241	1.04185	0.904907	0.137954	0.947707	0.755777	0.574843	0.0718969	0.867344	0.663523	0.490854
CG1128	alpha-Esterase-9	0.159358	1.07517	1.09253	1.06221	0.188872	1.30357	1.24333	1.01643	0.176005	1.3939	1.25611	1.02882	0.0245012	1.03868	1.02543	1.02757	0.233648	1.92532	0.936246	1.58181	0.370838	0.269069	0.34462	1.08775	0.81648	0.630539	0.506248	1.5574	0.876958	0.690313	0.634724	1.50735	0.489865	1.19749	1.61282	0.821116	0.472939	1.09653	1.03062	0.991625	0.773608	1.24884	1.0246	0.860726	0.742991	1.30185	1.0411	0.8404
CG12559	rolled	0.30333	0.844206	1.02629	0.906362	0.590591	0.604997	1.16752	0.913091	0.983589	0.697713	1.22907	1.08455	0.93501	0.943892	1.05737	0.98941	0.860078	0.641638	1.28457	0.955635	0.699109	1.66505	0.555576	1.25638	0.499939	1.23082	0.918502	1.16786	0.500803	1.21739	0.950973	1.12	0.601323	2.66465	1.34563	0.284438	0.597821	0.880017	1.04265	0.971884	0.521759	0.526934	1.11118	0.948386	0.673646	0.48592	1.15946	1.03323
CG12559	rolled	0.877565	1.03598	1.04913	0.887029	0.000612067	0.841998	0.793126	0.77296	0.00115652	0.77988	0.678755	0.755705	0.173709	1.01232	1.05866	1.02114	0.0342152	1.18244	1.22563	1.3536	0.106995	3.39266	5.71487	2.03634	0.0357751	3.03709	3.84486	2.03191	0.0349514	2.57084	3.02285	1.7307	0.0245563	0.681791	0.363141	0.236814	0.133193	0.929562	0.823954	0.644349	0.026933	0.759448	0.557654	0.464451	0.0145778	0.709177	0.468282	0.421958
CG13345	tumbleweed	0.0584067	0.91286	0.86391	0.959126	0.186923	0.682277	0.619905	1.00709	0.179632	0.617619	0.56929	1.00085	0.542765	0.999859	0.999103	1.02668	0.772179	0.933935	0.552507	1.92297	0.284943	1.63911	2.39876	0.897084	0.0673409	1.50803	1.6516	1.33469	0.0927092	1.43852	1.38441	1.25691	0.589094	0.862038	0.302211	1.28614	0.0996443	0.840492	0.821233	0.966708	0.238719	0.56303	0.524718	1.06377	0.204301	0.440145	0.397372	1.041
CG15636	Umbrea	0.158593	1.07733	1.02717	1.03187	0.255539	0.985777	0.821236	0.839619	0.0814479	0.889629	0.71353	0.705622	0.682326	1.00962	1.04055	0.978027	0.000513219	2.89618	2.34556	2.5414	0.417897	0.855203	2.39665	1.82089	0.0279252	2.08362	2.93739	2.58696	0.0255857	1.87942	2.62605	2.34421	0.547189	0.936317	1.20012	1.11058	0.124932	1.05133	1.2515	1.12995	0.233713	0.850255	0.844891	0.825136	0.0553106	0.736241	0.611344	0.63916
CG15636	Umbrea	0.289956	0.948958	0.942431	1.00477	0.0157322	0.677804	0.653735	0.693558	0.0142995	0.626851	0.574812	0.618992	0.640287	0.973287	1.03312	0.952551	0.761543	1.03413	1.3293	0.902776	0.0110903	3.62838	3.40822	2.67811	0.03809	2.83415	3.04473	2.09597	0.0363738	2.2602	2.41945	1.71378	0.00283358	0.41097	0.600233	0.456079	0.305065	0.88852	0.950262	0.991961	0.014448	0.590524	0.595972	0.646906	0.00926837	0.522644	0.49862	0.533074
CG15793	Downstream of raf1	0.130049	1.02443	1.03088	1.07644	0.944229	0.81308	0.785151	1.45546	0.92035	0.76574	0.736828	1.5956	0.000441377	1.05612	1.0557	1.04993	0.13782	0.568553	0.689124	0.425413	0.578399	1.67638	2.70997	0.144526	0.862284	1.25507	1.93785	0.134863	0.799619	1.18839	1.95294	0.294538	0.400348	0.280496	0.401055	1.20164	0.321408	0.972494	1.08611	1.0971	0.811347	0.71831	0.764058	1.35	0.78785	0.618963	0.649978	1.47057
CG15793	Downstream of raf1	0.000188338	1.10059	1.08946	1.10344	0.197384	0.74682	0.985758	0.859795	0.130458	0.667223	0.939124	0.765192	0.712865	0.95891	1.05144	1.02996	0.0262864	1.98546	2.87633	2.03258	0.248754	3.32471	0.818922	2.49638	0.0386014	2.75305	1.72398	2.49315	0.0667868	2.24595	1.45004	2.03141	0.660052	0.459695	1.41781	1.80673	0.0591391	1.11147	1.07416	1.05274	0.239907	0.800933	0.9923	0.745024	0.15237	0.658487	0.948053	0.623496
CG17360	CG17360	0.583906	1.1179	1.00607	0.972787	0.384927	1.42188	1.0836	0.974753	0.388176	1.48074	1.07114	0.984435	0.200116	1.07105	1.03913	1.00104	0.232206	0.269094	0.847756	0.64468	0.276553	0.0694813	0.400066	1.07476	0.369194	0.0546419	0.749278	1.11309	0.408844	0.166455	0.794196	1.13857	0.732226	0.936768	0.976939	1.23895	0.0660888	1.13621	1.09645	1.03846	0.198849	1.27329	1.1307	1.02532	0.33011	1.22023	1.08536	1.0128
CG17566	gamma-Tubulin at 37C	0.0283991	0.953657	0.891631	0.930382	0.00255232	0.697919	0.637804	0.645351	0.00211868	0.648106	0.589645	0.575075	0.359774	1.01509	0.955595	0.958534	0.186912	0.981328	0.68636	0.725361	0.00337561	2.0403	2.61775	2.43626	0.0290339	1.55991	1.64762	1.6361	0.0255156	1.50723	1.59365	1.54584	0.064441	0.733153	0.886465	0.821463	0.0635359	0.954971	0.908838	0.895023	0.00614594	0.749053	0.611214	0.598856	0.00293081	0.669663	0.522062	0.484206
CG1763	no distributive disjunction	0.559578	0.934767	0.973038	0.96634	0.458573	0.840571	0.892776	0.923189	0.407913	0.818509	0.868113	0.881477	0.165612	0.953403	0.996853	0.968256	0.435274	1.00535	0.995462	1.5268	0.808444	1.0636	0.773222	0.771108	0.211754	1.60261	1.34492	1.37526	0.233773	1.54448	1.30795	1.21174	0.217986	0.186658	0.300093	0.200406	0.523588	0.948826	0.94409	0.906374	0.393273	0.869761	0.867123	0.79243	0.295266	0.765349	0.818905	0.694666
CG17769	Androcam	0.82127	0.980688	0.980499	1.06143	0.459684	0.781589	0.784571	1.12035	0.3469	0.716118	0.726633	1.09276	0.982648	0.958784	0.995323	1.04793	0.160226	0.811139	0.694588	0.589841	0.341087	3.40504	3.37967	0.199903	0.44811	2.56387	2.50353	0.177978	0.444015	2.13505	2.15228	0.395309	0.972476	0.684604	1.0761	1.26204	0.0497991	1.05206	1.07417	1.13932	0.518261	0.787103	0.779532	1.14447	0.429453	0.689574	0.694086	1.15366
CG1782	Ubiquitin activating enzyme 1	0.841101	0.980921	1.02016	0.982168	0.350735	0.731062	0.764814	1.06096	0.522314	0.699192	0.758571	1.16221	0.19088	1.00463	1.04715	1.01983	0.361524	0.892523	0.761968	0.567615	0.80238	2.423	1.11388	0.10449	0.931014	1.83044	1.22822	0.104596	0.861874	1.79481	1.26437	0.236692	0.908001	0.822439	0.717962	1.3741	0.249477	0.922064	1.0081	0.93143	0.126256	0.689033	0.773926	0.964886	0.130514	0.603417	0.663871	0.964617
CG17927	Myosin heavy chain	0.884453	1.0253	1.02266	0.936469	0.000751676	0.620145	0.630328	0.556609	0.000688349	0.521944	0.552054	0.490977	0.493933	0.97338	0.951703	1.02191	0.0584753	2.22254	2.65139	1.58818	0.00191338	20.5216	23.0168	23.8708	4.3786e-09	15.1724	15.9746	15.6266	4.85762e-08	5.98085	6.32331	6.17357	0.00177084	0.537646	0.445468	0.28362	0.0768759	0.949207	0.913289	0.828872	0.000805799	0.609616	0.502463	0.426509	0.000272827	0.513984	0.404227	0.332215
CG2930	CG2930	0.119909	0.936947	0.951171	0.914886	0.134687	0.939317	0.866625	0.774472	0.116388	0.908132	0.838183	0.69852	0.916778	0.974174	0.965363	1.05068	0.964242	1.3847	0.842763	0.739463	0.220145	1.12421	1.79927	2.97518	0.0275882	1.97478	1.65778	2.19832	0.0299514	1.88725	1.41652	1.88768	0.541431	1.22356	0.697662	0.596468	0.687328	1.04544	1.00035	0.879548	0.255974	0.981661	0.870529	0.659479	0.165994	0.913699	0.804852	0.568148
CG3018	lesswright	0.162524	0.926129	0.96828	0.93041	0.112931	1.13913	1.18828	1.0607	0.00650742	1.25257	1.33036	1.18093	0.405621	1.03237	1.00329	1.01222	0.0031745	1.57497	1.53475	1.62234	0.000799477	0.602186	0.521755	0.426436	0.000374348	0.910791	0.891641	0.875569	0.0699642	0.976346	0.962995	0.951543	0.494369	0.884978	0.967939	0.359855	0.0207546	0.875284	0.895697	0.921235	0.685124	1.00293	0.943415	0.958889	0.555272	1.1012	1.01193	1.06002
CG3114	erect wing	0.0521946	1.07561	1.0294	1.08328	0.519957	0.823205	0.794374	1.12952	0.369197	0.749772	0.737176	1.10061	0.304891	0.953927	0.976525	0.997932	0.598539	0.585346	0.731185	1.28151	0.414523	1.83085	1.3719	0.76023	0.119864	1.204	1.15349	1.03798	0.0775637	1.16211	1.15609	1.05615	0.0292195	0.612451	0.767518	0.783322	0.930786	0.898279	1.04449	1.04103	0.236981	0.587493	0.787421	1.01437	0.125182	0.497455	0.703638	0.910483
CG31368	CG31368	0.809837	0.964433	0.987257	1.07923	0.704274	0.801586	1.18051	1.19066	0.601819	0.812663	1.22947	1.2102	0.363623	0.991413	1.02275	1.03576	0.723833	0.67874	1.23019	1.3469	0.769213	1.62036	0.712266	0.943035	0.591919	1.06851	0.818104	0.974569	0.310765	1.0128	0.769537	0.930242	0.368325	0.562561	0.787897	0.87492	0.441365	0.949551	1.05467	1.22905	0.769091	0.64381	1.2508	1.32242	0.843411	0.543561	1.29541	1.33435
CG3172	twinfilin	0.271691	1.00103	1.10782	1.03961	0.820887	0.720362	1.22626	1.18711	0.726047	0.702931	1.30331	1.23055	0.207339	1.01312	1.01539	1.06877	0.515721	0.728439	1.09685	2.28525	0.542941	2.17128	1.03511	0.795842	0.363542	1.37642	1.02798	1.11161	0.363887	1.33988	1.04962	1.08591	0.279993	3.50304	2.02575	0.836337	0.00600049	1.09093	1.05731	1.0638	0.790385	0.635872	1.14959	1.06625	0.666789	0.489252	1.17269	1.02198
CG3499	CG3499	0.278099	0.999292	1.0663	1.0402	0.00826872	1.43038	1.54467	1.29994	0.00989191	1.63752	1.69909	1.40278	0.814393	0.967349	1.00938	1.0079	0.0361041	2.13797	1.55577	1.69478	0.0358561	0.172065	0.180194	0.628476	0.11252	0.553059	0.461836	0.899426	0.0985364	0.602431	0.501726	0.887712	0.0916885	1.85525	1.19169	1.75173	0.0679434	1.05189	1.14862	1.1966	0.00765707	1.27098	1.45498	1.39174	0.00260423	1.47404	1.66876	1.4969
CG4254	twinstar	0.0387324	0.943279	0.931173	0.976425	0.0639513	1.33548	1.17924	1.10844	0.0915784	1.4279	1.22991	1.10685	0.78131	0.994219	1.00379	0.987197	0.305538	2.10839	1.36223	0.933348	0.211539	0.454483	0.719428	0.994245	0.271572	0.876152	0.953376	1.00389	0.315641	0.835948	0.941897	1.01526	0.772516	1.1819	0.914265	1.05616	0.570719	0.940407	0.927451	1.04348	0.203373	1.19885	1.06336	1.11853	0.225795	1.27978	1.06586	1.09287
CG4634	Nucleosome remodeling factor - 38kD	0.0740025	1.07187	1.14414	1.10398	0.326014	1.18656	1.04085	1.06207	0.768463	1.17093	0.970149	0.97744	0.814729	0.988672	0.99053	1.03925	0.787021	0.803033	0.956007	1.06152	0.965	0.679432	1.17943	1.07719	0.720393	0.86842	1.23427	1.30883	0.668394	0.902393	1.14508	1.3902	0.416579	1.03107	1.0044	3.31048	0.126354	1.13957	1.29688	1.06832	0.98863	1.02632	1.13273	0.834365	0.494523	0.967388	0.935255	0.711075
CG4843	Tropomyosin 2	0.57086	1.01405	0.984983	1.04082	0.929199	0.929906	0.799053	1.32013	0.979703	0.879253	0.757075	1.38128	0.444344	1.06531	0.989774	1.02388	0.603578	2.0953	0.951316	0.744267	0.90532	1.23571	0.792616	0.66796	0.422958	2.82097	1.56268	0.752064	0.339414	2.63222	1.56163	0.884716	0.364816	0.645715	0.187279	0.824886	0.415524	0.999303	1.02069	1.10933	0.950249	0.843886	0.830117	1.29073	0.952433	0.807008	0.75575	1.39147
CG5178	Actin 88F	0.485949	0.972981	1.02158	1.11833	0.142536	0.816215	0.826046	0.922669	0.0783814	0.737563	0.786215	0.815033	0.121742	0.975892	0.994764	0.962199	0.558845	1.24964	0.351805	0.839052	0.567906	6.36856	0.118534	0.654525	0.540296	5.39096	0.105897	1.1381	0.603206	3.86933	0.237696	0.969053	0.00676052	0.55794	0.203577	0.22941	0.573406	0.889778	1.10259	1.19667	0.110674	0.649008	0.784415	0.889025	0.0285662	0.529181	0.647751	0.693638
CG5643	widerborst	0.0291584	1.11111	1.08422	1.17675	0.781553	1.04295	0.826038	1.26151	0.873655	0.947037	0.749696	1.21959	0.0644775	1.05108	1.05004	1.01986	0.0128705	1.99111	1.51774	1.66462	0.807115	1.23294	1.88274	0.308925	0.41379	1.57824	1.86243	0.710963	0.421183	1.47213	1.75624	0.745294	0.421682	1.36668	0.677922	24.5492	0.724336	1.16667	1.08591	0.485403	0.384486	1.09167	0.828101	0.251664	0.263219	1.02495	0.680326	0.214063
CG6057	SMC1	0.217241	1.13623	0.989346	1.11366	0.206253	0.977871	1.30495	1.31621	0.286721	0.918813	1.40236	1.31738	0.0234677	1.06176	1.03425	1.08148	0.977131	1.61552	0.68384	0.735161	0.872003	2.53353	0.456609	0.43286	0.917875	2.65318	0.269122	0.375422	0.838994	2.29685	0.552684	0.583666	0.75906	0.670744	1.22589	1.35515	0.275452	1.14029	0.973374	1.11651	0.0929917	1.04586	1.21123	1.14956	0.373723	0.939632	1.27701	1.13667
CG6174	Actin-related protein 87C	0.349435	1.0471	0.994425	1.02165	0.279472	0.829156	0.68642	1.03741	0.339292	0.776149	0.593423	1.08991	0.339521	0.994542	1.03013	1.02899	0.518791	0.808266	1.35223	1.25493	0.195091	13.0628	16.8606	0.854969	0.222535	6.09651	9.98791	0.82115	0.209243	3.48239	4.88069	0.940375	0.0400621	0.503983	0.368035	0.692728	0.0909367	0.91014	0.896066	0.980405	0.120848	0.677294	0.57423	0.934011	0.167434	0.58278	0.461717	0.977419
CG6235	twins	0.190901	1.02079	1.12743	1.04001	0.907263	1.10407	1.14319	0.801968	0.843028	1.07885	1.0957	0.731392	0.966801	1.00522	1.03767	0.953439	0.668707	0.872655	0.976889	0.668906	0.92736	0.840672	0.394019	1.93277	0.624116	1.14083	0.78284	1.70141	0.606907	1.10996	0.852917	1.5598	0.679933	0.894555	1.23865	0.521219	0.209902	1.01002	1.15238	1.06044	0.97212	1.05195	1.13232	0.82913	0.743424	1.02906	1.07656	0.738185
CG6238	slingshot	0.203169	0.947827	0.870226	0.990492	0.434198	1.07347	0.764191	0.868137	0.52544	1.09486	0.759427	0.879469	0.984455	1.02865	0.971333	1.00129	0.149886	0.92094	0.866898	0.751183	0.358238	0.983783	1.35064	1.31789	0.627826	0.993446	1.16309	1.04004	0.510751	1.04792	1.2402	0.989704	0.952759	1.56797	0.742954	0.628309	0.716865	1.08403	0.814034	0.997754	0.653307	1.23272	0.694488	0.790244	0.598736	1.23831	0.625898	0.754499
CG6335	Histidyl-tRNA synthetase	0.729475	1.0217	0.991695	0.95349	0.0750911	0.920653	0.796998	0.705914	0.124683	0.926534	0.749964	0.67691	0.684808	1.00466	1.02994	0.990266	0.442587	2.30411	0.811965	1.1735	0.207353	1.10341	1.96736	2.26534	0.03686	1.85107	1.82503	2.34455	0.0269633	1.84922	1.72489	2.13468	0.669342	0.4388	0.42038	3.85067	0.175569	0.967537	0.94838	0.889361	0.0182075	0.727827	0.684288	0.590781	0.0430766	0.692404	0.607224	0.489367
CG6502	Enhancer of zeste	0.0776199	1.14502	1.03839	1.0867	0.842858	1.06906	0.947195	0.929512	0.206322	0.939935	0.827195	0.782383	0.895976	0.968639	1.03561	1.00495	0.14263	2.4347	1.2286	1.75748	0.481162	0.615188	1.94711	1.84088	0.152262	1.20153	1.84945	2.38201	0.162829	1.12879	1.67716	2.18224	0.0881622	0.650689	0.819875	0.86055	0.568849	1.00954	1.0212	1.02633	0.483579	0.968505	0.936936	0.86455	0.25259	0.92732	0.837277	0.744746
CG6875	abnormal spindle	0.630517	0.984362	1.01981	1.01785	0.340447	0.920312	1.00798	0.859095	0.494784	0.938827	1.02872	0.844345	0.433532	1.04602	0.989337	1.026	0.194749	1.16752	1.2868	1.06124	0.867593	0.986572	0.818092	1.10261	0.395328	1.06209	1.03687	1.0815	0.748677	0.965777	0.976944	1.00014	0.138289	1.17798	1.30283	1.03546	0.132683	1.02159	1.15829	1.19494	0.488761	0.971802	1.30635	0.995804	0.662467	0.966701	1.36194	0.896949
CG6875	abnormal spindle	0.00193096	1.1168	1.15506	1.17848	0.0691328	0.84067	0.778065	0.795844	0.0618482	0.783457	0.7197	0.742309	0.690583	1.04078	0.990985	0.917963	0.131671	1.49958	1.57829	2.05886	0.0905293	2.25219	4.43903	2.23353	0.0181366	1.98711	2.69192	2.3243	0.0278864	1.70706	2.18591	2.00944	0.115055	0.625243	0.769894	0.832845	0.0317562	1.08237	1.14557	1.20323	0.167368	0.87683	0.840252	0.819727	0.14583	0.841904	0.795368	0.770607
CG7069	CG7069	0.371934	0.879117	0.989662	0.995668	0.140212	0.659254	0.903023	0.879091	0.155301	0.667191	0.880241	0.882258	0.900756	0.964683	1.01035	1.01616	0.998471	0.920776	1.01093	1.06742	0.175746	1.62506	1.84135	1.66938	0.106756	1.39998	1.6606	1.47524	0.107849	1.28237	1.55032	1.38797	0.0978015	0.165063	0.325383	0.180038	0.197125	0.826388	0.946199	0.932378	0.041509	0.544445	0.731356	0.66628	0.0546283	0.453638	0.699895	0.610804
CG7434	Ribosomal protein L22	0.895142	1.12395	0.961666	0.941135	0.206056	0.864173	0.987015	0.908264	0.223027	0.763816	0.995043	0.879975	0.84449	0.984828	0.997746	1.00743	0.687475	0.800581	0.684629	1.22947	0.335645	6.01319	0.340496	2.82453	0.476654	3.10664	0.18344	1.9662	0.472313	2.37546	0.515333	1.56366	0.021035	0.487796	0.715199	0.347113	0.482912	1.1109	0.823527	0.813615	0.0179994	0.827908	0.791235	0.655422	0.00568717	0.735176	0.7484	0.607217
CG7809	Grasp65	0.241674	1.03973	1.00743	1.11508	0.812548	0.826954	0.762939	1.27024	0.825805	0.785846	0.724627	1.33327	0.738039	0.952012	1.03868	1.04509	0.746394	0.882506	0.626033	1.25708	0.507594	1.6126	2.04928	0.511021	0.517673	1.27378	1.34398	0.835516	0.508771	1.29732	1.26648	0.861386	0.642751	0.727772	0.469253	1.36033	0.11461	1.15469	1.04205	1.09601	0.625801	0.9001	0.740647	1.12294	0.555196	0.796161	0.627074	1.17912
CG7904	punt	0.00232283	1.07823	1.10888	1.07071	0.60546	0.971045	0.99953	0.894827	0.347537	0.919339	0.930124	0.836828	0.0569846	0.98283	0.97095	0.948937	0.825388	1.07227	1.15316	0.92738	0.177082	1.57887	1.51276	2.22043	0.150242	1.98202	1.43822	1.90698	0.172519	1.81968	1.20914	1.67492	0.333244	0.680253	1.00275	0.79568	0.395294	1.01229	1.22452	1.00148	0.984737	0.929679	1.19739	0.864675	0.598964	0.884798	1.0895	0.79196
CG8166	unc-5	0.937818	0.963953	1.03022	1.01409	0.35686	0.745448	1.02307	0.927208	0.34162	0.699344	1.02159	0.903838	0.955324	0.987508	0.978283	1.03802	0.231603	0.571266	0.98328	0.671622	0.379889	1.56779	0.874083	1.27297	0.247715	1.09435	0.99655	1.06997	0.375165	1.0984	0.986034	1.04343	0.358146	5.9857	1.50584	1.07962	0.0448841	1.08707	1.25829	1.2331	0.640949	0.771044	1.43819	1.11348	0.88706	0.608586	1.45823	1.0563
CG8166	unc-5	0.604634	0.9915	1.0146	0.942336	0.835664	1.10907	1.09135	0.873504	0.731151	1.16746	1.11827	0.865137	0.0467618	1.03248	1.03597	1.04256	0.00941938	1.50149	1.61987	1.35752	0.400937	0.359715	0.493455	1.14189	0.798457	0.808271	0.775451	1.25298	0.695408	0.815863	0.764199	1.19555	0.381944	1.01148	1.20194	1.1417	0.00583993	1.15786	1.21857	1.16075	0.0385145	1.34462	1.36519	1.24701	0.115775	1.36124	1.30442	1.18738
CG8355	slit	0.552837	1.02812	1.01082	1.03617	0.322277	1.14954	1.0673	1.11145	0.662233	1.09416	0.981279	1.08919	0.256276	1.07863	1.0138	1.01065	0.985475	1.28076	0.855368	0.88171	0.545329	0.66518	1.00453	0.865539	0.901491	0.953747	1.04764	1.0273	0.597942	0.923797	0.990934	0.95915	0.169286	1.25267	1.56914	1.06428	0.0803864	1.07287	1.08948	1.04951	0.320559	1.12959	1.1271	1.04701	0.532723	1.13727	1.0991	1.03125
CG8649	Fimbrin	0.560944	1.06796	0.969323	1.02792	0.0145328	0.865545	0.753954	0.738701	0.00464946	0.775129	0.68134	0.644817	0.00012862	0.93911	0.933725	0.949275	0.628503	2.20742	0.547633	1.12645	0.0204889	4.15505	6.6322	7.00234	0.0101075	4.21802	2.84557	4.5423	0.0134396	3.10272	2.17753	3.38374	0.00375732	0.4556	0.289262	0.341663	0.537647	1.05628	0.967957	1.06132	0.0278777	0.818036	0.754471	0.771094	0.0128583	0.710617	0.658543	0.646488
CG8770	G protein beta-subunit 76C	0.466701	0.990916	0.907779	1.01429	0.808963	0.758963	1.02644	1.11883	0.676029	0.682115	1.01215	1.10607	0.0797414	1.01914	1.05892	1.03252	0.490279	1.2368	1.30108	0.869964	0.598901	6.04595	0.331267	0.258329	0.681093	4.48207	0.362846	0.219372	0.654466	3.24281	0.681491	0.503747	0.726766	0.681094	0.985838	1.15183	0.364854	0.933152	0.845669	1.03246	0.582758	0.752869	0.915233	1.11832	0.441783	0.645724	0.899783	1.08396
CG9446	coro	0.493318	1.05181	1.05105	1.00218	0.0454532	0.873297	0.811346	0.764497	0.0267631	0.79397	0.737832	0.691165	0.017102	0.953047	0.957366	0.957172	0.369647	1.80627	1.02482	1.14275	0.92793	0.653688	0.813145	1.29147	0.163592	2.01045	1.9096	2.91109	0.185799	1.57905	1.51553	2.26958	0.00805411	0.618147	0.330432	0.421343	0.255544	1.1652	1.20525	1.01001	0.489258	0.965067	0.973388	0.729777	0.193606	0.82019	0.845854	0.625388
CG9675	spheroide	0.0418389	0.952089	0.909053	0.959226	0.03406	0.780895	0.725613	0.70549	0.0537557	0.766052	0.696043	0.665549	0.852591	1.01081	1.06951	0.943304	0.00435979	0.659875	0.57667	0.576718	0.109618	1.15555	1.62737	1.83993	0.245243	1.03481	1.25451	1.26552	0.222136	1.04054	1.22666	1.23367	0.0253323	0.692916	0.61687	0.395208	0.561817	1.03351	1.0077	1.00709	0.159706	0.932889	0.811787	0.744109	0.0735769	0.843983	0.681483	0.59327
CG10023	Focal Adhesion Kinase	0.00258101	1.13034	1.12633	1.08697	0.562789	1.25277	1.10135	0.897926	0.650675	1.25604	1.0721	0.881137	0.391848	1.00252	1.04872	1.02279	0.586404	1.67234	0.926387	0.924799	0.994423	0.78785	1.04406	1.17207	0.854586	0.922874	1.02074	1.03053	0.265798	0.883125	0.9763	0.984875	0.592999	1.39672	1.00153	0.946775	0.0257239	1.39326	1.35587	1.17985	0.203718	1.68629	1.45111	0.982288	0.308864	1.63336	1.41802	0.883491
CG11527	Tiggrin	0.771907	1.00609	1.04388	0.972405	0.0434437	0.896354	0.829029	0.728423	0.0415369	0.88662	0.781365	0.695973	0.0566585	0.957216	0.906683	0.962759	0.0102827	0.570363	0.535441	0.459209	0.00284663	1.79278	2.02239	2.27189	0.0146439	1.18268	1.19875	1.24839	0.135983	1.16058	1.11915	1.03996	0.0311975	0.756176	0.756414	0.534623	0.796437	1.00308	1.03683	0.927389	0.0439156	0.878039	0.79262	0.661918	0.0353058	0.826497	0.703855	0.565052
CG12298	subito	0.0209825	0.939123	0.95693	0.971947	0.954416	1.00048	0.985617	1.02206	0.868313	0.994145	0.983479	1.05378	0.795125	1.02971	1.01341	0.972369	0.540965	0.992409	1.365	0.964408	0.543469	0.929222	0.816584	0.865001	0.943868	1.05292	1.00255	0.965157	0.958279	1.07456	0.968086	0.942233	0.0597441	1.41152	1.18075	1.17471	0.732678	0.976672	0.984555	1.01315	0.701643	1.05335	1.01054	0.993732	0.909837	1.01164	0.991396	0.975918
CG1258	pavarotti	0.298986	0.979969	0.994911	0.978345	0.0427805	0.877393	0.797615	0.716775	0.0427267	0.845139	0.781218	0.678959	0.74984	0.995417	1.011	0.97418	0.106211	0.744881	0.880717	0.712911	0.0257613	1.47956	1.39391	1.6516	0.150179	1.15796	1.13582	1.17574	0.200527	1.15522	1.11035	1.11474	0.00573159	0.79238	0.744912	0.700025	0.00149148	0.853297	0.890123	0.876771	0.00150064	0.643913	0.668147	0.584195	0.00181074	0.560128	0.573395	0.492659
CG5650	Protein phosphatase 1 at 87B	0.570892	1.00188	1.00401	0.899779	0.368421	0.965174	0.871449	0.99389	0.362509	0.916622	0.827617	1.02239	0.00730982	1.05982	1.04725	1.03257	0.147716	0.510466	0.746121	0.854362	0.44163	2.38952	2.50657	0.234651	0.916694	1.31917	1.53601	0.292086	0.961423	1.18892	1.46414	0.403084	0.666608	0.878372	0.649084	1.19993	0.849717	1.05075	1.09103	0.902593	0.630869	0.970178	0.928411	0.96924	0.310758	0.874558	0.826118	0.938572
CG7178	wings up A	0.00137956	1.08095	1.08399	1.06351	0.0020088	0.80977	0.777846	0.70715	0.000437516	0.70352	0.688555	0.634128	0.88341	1.01612	1.02708	0.967369	0.149339	1.11104	1.64016	1.27179	0.0211618	6.32201	7.38307	10.8455	0.0023406	4.20167	5.5064	6.19822	0.00731778	2.66537	3.47736	4.09473	0.263345	0.152453	1.06962	0.568186	0.279065	0.881496	0.973435	0.988656	1.62888e-05	0.591843	0.654325	0.637182	4.96915e-05	0.50609	0.525939	0.520062
CG7831	non-claret disjunctional	0.715691	1.04341	0.980538	1.00681	0.590882	1.10694	0.993352	0.995519	0.489811	1.16195	1.01572	0.989747	0.937223	1.0208	0.999648	0.975179	0.239295	0.897921	0.590943	0.858413	0.760603	0.382526	1.46012	0.775611	0.495492	0.59388	0.982841	0.94034	0.486267	0.662508	0.9387	0.995794	0.0130819	1.41512	1.57508	1.40863	0.00890915	1.16824	1.12536	1.11296	0.040895	1.29202	1.28015	1.1202	0.122747	1.28834	1.2314	1.06171
CG10295	PAK-kinase	-	-	-	-	-	-	-	-	-	-	-	-	-	-	-	-	-	-	-	-	-	-	-	-	-	-	-	-	-	-	-	-	-	-	-	-	-	-	-	-	-	-	-	-	-	-	-	-
CG10521	Netrin-B	0.0750218	1.13017	1.12143	1.12502	0.0242607	1.13816	1.172	1.18389	0.0493794	1.08319	1.13722	1.1889	0.00585016	1.01167	1.01824	1.01429	0.0152641	1.15454	1.23335	1.12924	0.0489578	1.17436	1.31853	1.11728	0.0631663	1.14163	1.28078	1.14442	0.0395625	1.12944	1.24919	1.10788	0.750016	1.30001	0.58977	0.876406	0.027826	1.10155	1.20002	1.1258	0.0160662	1.18266	1.39287	1.32803	0.0219486	1.16604	1.38402	1.3404
CG11242	CG11242	0.0958083	1.22706	1.06363	1.1014	0.141263	1.30182	1.08545	1.08765	0.260769	1.31244	1.06695	1.03039	0.138308	1.00698	1.00585	1.0142	0.187836	1.18054	1.09506	1.02334	0.0613404	1.23294	1.14046	1.07636	0.205455	1.28401	1.10111	1.03513	0.132515	1.16607	1.09425	1.03058	0.27518	0.90556	0.841844	0.766399	0.00126978	1.15042	1.13272	1.11583	0.00485687	1.35682	1.2698	1.20593	0.0491347	1.35382	1.23341	1.11484
CG11870	CG11870	0.0855727	1.23465	1.05359	1.15283	0.0890877	1.24502	1.06917	1.11613	0.277295	1.11529	1.01916	1.04207	0.132458	0.988457	0.996256	0.988593	0.0199337	1.20244	1.17936	1.11483	0.243955	1.20136	1.15831	0.987764	0.228044	1.26583	1.17851	0.992049	0.197002	1.16749	1.12177	1.00964	0.160054	0.937289	0.889945	0.685152	0.27911	1.2684	0.98437	1.10702	0.30094	1.3512	0.989939	1.0999	0.443147	1.23372	0.971247	1.02964
CG30046	CG30046	0.000976651	0.776884	0.799263	0.778738	5.47716e-05	0.798154	0.743607	0.765295	0.0039658	0.836983	0.737501	0.766824	0.774732	1.00786	0.985427	1.01858	0.390813	0.514997	1.06033	0.896937	0.310152	0.535406	0.981247	0.920951	0.498695	0.47915	1.11716	0.933489	0.320915	0.585343	1.00149	0.91619	0.209238	0.201737	0.83213	0.827476	0.688205	0.889189	1.07894	0.934881	0.548019	0.770485	1.13181	0.852965	0.56177	0.776296	1.13055	0.8651
CG3114	erect wing	0.824797	1.1696	1.18649	0.755743	0.65716	1.09353	1.06502	0.568884	0.590825	1.08569	1.04761	0.487573	0.277843	1.02209	0.994825	1.02898	0.971892	1.03691	1.04096	0.91285	0.576672	1.08889	1.13964	0.918294	0.743245	1.04398	1.25343	0.850383	0.598133	1.04347	1.09551	0.960495	0.495962	1.29382	1.60448	0.755343	0.548495	1.22207	1.24117	0.830295	0.976229	1.21982	1.22782	0.527996	0.80388	1.17321	1.18065	0.423738
CG31368	CG31368	0.152699	0.680544	0.807647	0.968148	0.00748606	0.608764	0.693639	0.750463	0.00641829	0.587942	0.630412	0.680252	0.241599	1.01602	1.02816	1.01252	0.0910673	0.712104	0.833649	0.392984	0.0959459	0.743312	0.861355	0.476991	0.0630591	0.428815	0.811305	0.280261	0.0553888	0.674341	0.829968	0.466716	0.289615	1.09192	0.31074	0.480318	0.215764	0.741601	0.89075	0.985816	0.0264535	0.551188	0.8068	0.709504	0.0112728	0.45936	0.731818	0.576895
CG1479	bent	-	-	-	-	-	-	-	-	-	-	-	-	-	-	-	-	-	-	-	-	-	-	-	-	-	-	-	-	-	-	-	-	-	-	-	-	-	-	-	-	-	-	-	-	-	-	-	-
CG33171	CG33171	-	-	-	-	-	-	-	-	-	-	-	-	-	-	-	-	-	-	-	-	-	-	-	-	-	-	-	-	-	-	-	-	-	-	-	-	-	-	-	-	-	-	-	-	-	-	-	-
CG5178	Actin 88F	0.718912	1.14702	1.15187	0.835981	0.558808	1.21949	1.13977	0.866283	0.636321	1.24128	1.13501	0.830102	0.467357	1.00298	1.0247	0.99799	0.446196	1.33564	1.1356	0.896329	0.711212	1.20112	1.10068	0.841999	0.646508	1.33877	1.11984	0.799179	0.527709	1.17006	1.0894	0.920919	0.782896	1.08315	1.27489	0.784892	0.994583	1.12142	1.03724	0.839268	0.633739	1.28799	1.09418	0.839753	0.746463	1.31797	1.07089	0.785484
CG5406	still life	-	-	-	-	-	-	-	-	-	-	-	-	-	-	-	-	-	-	-	-	-	-	-	-	-	-	-	-	-	-	-	-	-	-	-	-	-	-	-	-	-	-	-	-	-	-	-	-
CG5972	Arc-p20	-	-	-	-	-	-	-	-	-	-	-	-	-	-	-	-	-	-	-	-	-	-	-	-	-	-	-	-	-	-	-	-	-	-	-	-	-	-	-	-	-	-	-	-	-	-	-	-
CG6059	CG6059	0.583714	1.07946	0.981698	1.02371	0.877358	1.14572	0.877684	0.932303	0.61141	1.11147	0.850763	0.887023	0.271331	0.997509	0.988418	0.9846	0.0344881	1.20007	1.0929	1.23104	0.0868499	1.11338	1.07121	1.10593	0.134058	1.23737	1.03208	1.26439	0.0536418	1.12815	1.05858	1.13862	0.0883377	1.14996	1.48607	1.70981	0.394728	1.08554	1.02726	1.00861	0.427566	1.25938	0.969133	1.03274	0.553841	1.30439	0.92452	1.01409
CG6238	slingshot	0.000141325	0.7783	0.828915	0.780479	0.000606898	0.656109	0.713577	0.602312	0.00475252	0.656371	0.675279	0.519914	0.186016	1.02723	1.00316	1.01161	0.269443	0.548122	1.0136	0.830506	0.182402	0.630672	0.992308	0.752946	0.305656	0.499989	1.08794	0.709392	0.154717	0.628698	0.959265	0.791384	0.024885	0.321737	0.725273	0.466482	0.0150562	0.717548	0.861976	0.793763	0.000844962	0.481274	0.627409	0.56428	1.77571e-05	0.477243	0.561918	0.485132
CG7794	CG7794	-	-	-	-	-	-	-	-	-	-	-	-	-	-	-	-	-	-	-	-	-	-	-	-	-	-	-	-	-	-	-	-	-	-	-	-	-	-	-	-	-	-	-	-	-	-	-	-
CG8104	nudE	-	-	-	-	-	-	-	-	-	-	-	-	-	-	-	-	-	-	-	-	-	-	-	-	-	-	-	-	-	-	-	-	-	-	-	-	-	-	-	-	-	-	-	-	-	-	-	-
CG8581	frazzled	0.876044	1.37598	1.01877	0.709904	0.584798	1.54066	1.14217	0.758194	0.583137	1.48712	1.09385	0.805728	0.00417158	0.963343	0.977931	0.968357	0.0969855	0.894682	0.553323	0.751057	0.548039	1.07994	0.81521	0.911289	0.617678	1.19291	0.750111	0.780231	0.341093	1.05045	0.781191	0.844189	0.831567	1.04739	0.853418	0.990297	0.732876	1.31566	1.12871	0.754203	0.410359	1.58609	1.41433	0.769959	0.351222	1.63539	1.38841	0.833334
CG8581	frazzled	0.0386377	0.911103	0.910977	0.858205	0.021592	0.820613	0.818771	0.660827	0.0235893	0.801308	0.824183	0.648041	0.804172	1.01731	1.02685	0.973404	0.0332344	0.574238	0.697442	0.569037	0.216958	1.25732	1.00551	1.40774	0.14009	1.08603	1.009	1.07238	0.311358	0.970852	1.11624	1.10291	0.366455	0.777319	1.47469	2.69483	0.734376	0.92367	1.10137	1.04076	0.397182	0.819645	1.05281	0.79111	0.45229	0.819261	1.08351	0.716355
CG8649	Fimbrin	0.595796	1.0822	1.05888	0.501032	0.441485	1.01115	1.00937	0.345373	0.37174	0.948283	0.990224	0.326771	0.567772	0.993384	0.98883	1.00586	0.630634	1.15694	0.990501	0.539108	0.336304	0.989318	0.922482	0.447962	0.360952	1.04086	0.87967	0.39006	0.330638	1.01704	0.888181	0.491259	0.171038	0.776833	0.715907	0	0.335118	0.960435	0.965812	0.53123	0.252761	0.878749	0.90621	0.337692	0.236179	0.841038	0.90909	0.313376
CG9749	Abelson Interacting Protein	0.982868	0.954988	1.01718	1.03745	0.0537988	0.801021	0.890137	0.899813	0.0186503	0.746831	0.81667	0.819199	0.225704	0.999153	1.03318	1.0196	0.466685	1.04633	1.21482	1.26466	0.584307	0.939659	1.12853	1.18285	0.774809	0.76342	0.910651	0.925176	0.411965	1.00258	1.17038	1.20758	0.000252598	1.77775	1.63955	1.6242	0.151672	1.13059	1.09077	1.10675	0.0325171	1.08221	1.16046	1.17902	0.027994	1.10549	1.18015	1.24155
CG17367	Lnk	-	-	-	-	-	-	-	-	-	-	-	-	-	-	-	-	-	-	-	-	-	-	-	-	-	-	-	-	-	-	-	-	-	-	-	-	-	-	-	-	-	-	-	-	-	-	-	-
CG17369	Vacuolar H[+]-ATPase 55kD B subunit	-	-	-	-	-	-	-	-	-	-	-	-	-	-	-	-	-	-	-	-	-	-	-	-	-	-	-	-	-	-	-	-	-	-	-	-	-	-	-	-	-	-	-	-	-	-	-	-
CG4578	cap-n-collar	-	-	-	-	-	-	-	-	-	-	-	-	-	-	-	-	-	-	-	-	-	-	-	-	-	-	-	-	-	-	-	-	-	-	-	-	-	-	-	-	-	-	-	-	-	-	-	-
CG2174	unconventional myosin class XV	-	-	-	-	-	-	-	-	-	-	-	-	-	-	-	-	-	-	-	-	-	-	-	-	-	-	-	-	-	-	-	-	-	-	-	-	-	-	-	-	-	-	-	-	-	-	-	-
CG2248	Rac1	-	-	-	-	-	-	-	-	-	-	-	-	-	-	-	-	-	-	-	-	-	-	-	-	-	-	-	-	-	-	-	-	-	-	-	-	-	-	-	-	-	-	-	-	-	-	-	-
CG4869	beta-Tubulin at 97EF	-	-	-	-	-	-	-	-	-	-	-	-	-	-	-	-	-	-	-	-	-	-	-	-	-	-	-	-	-	-	-	-	-	-	-	-	-	-	-	-	-	-	-	-	-	-	-	-
CG7012	nicastrin	-	-	-	-	-	-	-	-	-	-	-	-	-	-	-	-	-	-	-	-	-	-	-	-	-	-	-	-	-	-	-	-	-	-	-	-	-	-	-	-	-	-	-	-	-	-	-	-
CG8222	PDGF- and VEGF-receptor related	-	-	-	-	-	-	-	-	-	-	-	-	-	-	-	-	-	-	-	-	-	-	-	-	-	-	-	-	-	-	-	-	-	-	-	-	-	-	-	-	-	-	-	-	-	-	-	-
CG8308	alpha-Tubulin at 67C	-	-	-	-	-	-	-	-	-	-	-	-	-	-	-	-	-	-	-	-	-	-	-	-	-	-	-	-	-	-	-	-	-	-	-	-	-	-	-	-	-	-	-	-	-	-	-	-
CG9901	Actin-related protein 14D	-	-	-	-	-	-	-	-	-	-	-	-	-	-	-	-	-	-	-	-	-	-	-	-	-	-	-	-	-	-	-	-	-	-	-	-	-	-	-	-	-	-	-	-	-	-	-	-
CG1017	CG1017	0.000252764	1.38652	1.30198	1.31552	0.00182157	1.33181	1.35478	1.48579	0.0116383	1.26261	1.3015	1.47327	0.0560899	0.976971	0.98755	0.971171	0.0509499	1.38867	1.14539	1.4849	0.0263745	1.31862	1.17225	1.42954	0.00592596	1.71468	1.44511	1.75863	0.00948577	1.26561	1.18501	1.34363	0.070819	1.84948	1.23397	1.99334	0.0131845	1.40601	1.27398	1.24471	0.000144775	1.45911	1.35717	1.44398	0.000495377	1.40734	1.35257	1.47795
CG1106	Gelsolin	0.0124084	1.12117	1.18545	1.1093	0.189395	1.13731	1.27086	1.01841	0.238167	1.13812	1.31099	1.00526	0.0405179	0.979578	0.989109	0.987137	0.968884	1.07881	0.933119	0.996918	0.83732	1.05787	1.01572	0.96998	0.140562	1.27664	1.10689	1.12463	0.578525	1.08894	1.04234	0.978054	0.837802	0.598364	1.37913	1.20081	0.191271	1.04763	1.0424	1.05647	0.943314	1.00529	1.01642	0.962646	0.738141	0.98487	0.997192	0.939403
CG11527	Tiggrin	0.0110307	1.37135	1.19491	1.2482	0.0191325	1.42346	1.20295	1.28271	0.0420181	1.31766	1.11777	1.20363	0.473225	0.970583	0.99371	1.00667	0.0436643	1.31715	1.29395	1.10435	0.00145835	1.29691	1.35397	1.23107	0.0327546	1.4294	1.55989	1.20918	0.0138418	1.22244	1.31728	1.15506	0.0901537	1.42454	1.48362	1.09677	0.0209867	1.2032	1.17625	1.08634	0.0163042	1.33429	1.34858	1.17017	0.0259812	1.27052	1.24031	1.11155
CG11678	Actin-related protein 13E	-	-	-	-	-	-	-	-	-	-	-	-	-	-	-	-	-	-	-	-	-	-	-	-	-	-	-	-	-	-	-	-	-	-	-	-	-	-	-	-	-	-	-	-	-	-	-	-
CG1258	pavarotti	0.000104993	1.66825	1.58129	1.51205	0.0197459	1.61724	1.44797	1.30613	0.0716974	1.30365	1.17153	1.08897	0.00154997	0.965685	0.963668	0.953718	0.0298061	1.16535	1.37957	1.24162	0.177109	1.11214	1.28782	1.03725	0.0199326	1.23666	1.35804	1.16635	0.154274	1.09166	1.28435	1.06318	0.0081822	1.59755	1.34648	1.60116	0.0351303	1.60826	1.61263	1.28155	0.113206	1.76327	1.61088	1.13484	0.165133	1.60536	1.44548	1.03395
CG18214	trio	-	-	-	-	-	-	-	-	-	-	-	-	-	-	-	-	-	-	-	-	-	-	-	-	-	-	-	-	-	-	-	-	-	-	-	-	-	-	-	-	-	-	-	-	-	-	-	-
CG5701	RhoBTB	-	-	-	-	-	-	-	-	-	-	-	-	-	-	-	-	-	-	-	-	-	-	-	-	-	-	-	-	-	-	-	-	-	-	-	-	-	-	-	-	-	-	-	-	-	-	-	-
CG7831	non-claret disjunctional	0.0815342	0.771154	0.935445	0.695701	0.00452588	0.672959	0.807228	0.678427	0.000416488	0.650388	0.749779	0.670987	0.120496	0.980333	0.992051	0.989368	0.000645429	0.57507	0.694566	0.674669	0.00169601	0.626077	0.732448	0.744619	0.00240606	0.557457	0.723829	0.64783	0.00441259	0.65785	0.783688	0.774106	0.00636347	0.471788	0.473318	0.392819	0.113045	0.836907	0.976724	0.828744	0.0256998	0.696137	0.875708	0.743996	0.0191811	0.629078	0.82146	0.705822
CG7846	Actin-related protein 8	0.0852474	1.43466	1.09032	1.34934	0.0964821	1.61999	1.12542	1.50566	0.112054	1.52972	1.07805	1.46945	0.655686	1.0182	0.993873	0.999995	0.128862	1.28039	1.02988	1.31288	0.0928039	1.42949	1.0876	1.42951	0.085307	1.64991	1.14708	1.62592	0.116172	1.33714	1.0432	1.33505	0.00338616	2.20328	1.77405	1.82711	0.242201	1.18345	1.00254	1.07244	0.272731	1.43499	0.965156	1.20307	0.295051	1.38096	0.955117	1.17945
CG8978	Suppressor of profilin 2	-	-	-	-	-	-	-	-	-	-	-	-	-	-	-	-	-	-	-	-	-	-	-	-	-	-	-	-	-	-	-	-	-	-	-	-	-	-	-	-	-	-	-	-	-	-	-	-
CG9277	beta-Tubulin at 56D	-	-	-	-	-	-	-	-	-	-	-	-	-	-	-	-	-	-	-	-	-	-	-	-	-	-	-	-	-	-	-	-	-	-	-	-	-	-	-	-	-	-	-	-	-	-	-	-
[truncated: 63 more columns]
